# Supplementary material
Source: PubMed Central journal article supplement (PMC9282759)
Supplement: mmc1.pdf [file mmc1.pdf]

# THE LANCET

## Supplementary appendix

This appendix formed part of the original submission. We post it as supplied by the authors.

Supplement to: Messacar K, Baker R E, Park S W, et al. Preparing for uncertainty: endemic paediatric viral illnesses after COVID-19 pandemic disruption. *Lancet* 2022; published online July 14. [https://doi.org/10.1016/S0140-6736\(22\)01277-6](https://doi.org/10.1016/S0140-6736(22)01277-6).

**Supplementary Web Figure: Trends in Respiratory Virus Positivity Rates in the US 2019-2022 from Clinical Testing on the BIOFIRE FILMARRAY Respiratory Panels**

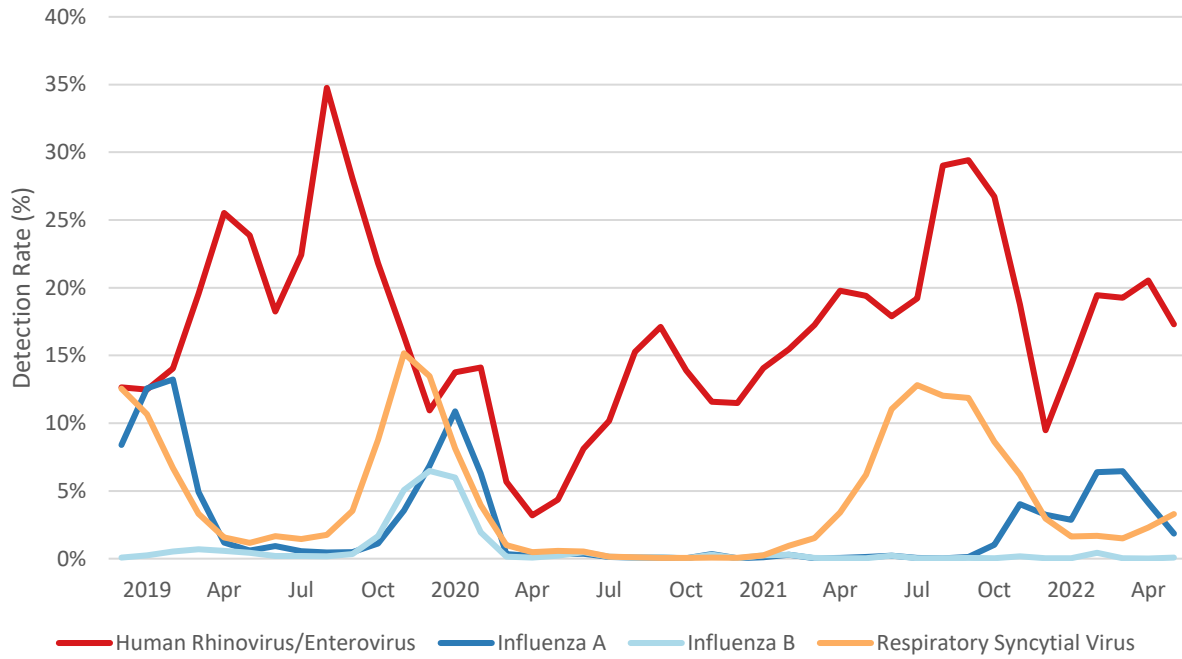

**Legend:**

Percent positivity for clinical testing on the BIOFIRE FILMARRAY Respiratory Panels (1.7, 2.0, 2.1) multiplex PCR test from US sites participating in the BIOFIRE Syndromic Trends program from 2019-present of rhinovirus/enterovirus (RV/EV [red]; cannot distinguish), respiratory syncytial virus (RSV [orange]); influenza virus (A [dark blue] and B [light blue]).
